# Supplementary material for: Hierarchical mesoporous silica nanoparticles as superb light scattering materials
Source: Royal Society of Chemistry journal article supplement (doi:10.1039/c5cc10145j), 2015-12-24
Supplement: c5cc10145j1.pdf [file c5cc10145j1.pdf]

*Supplementary Information for:*

## **Hierarchical Mesoporous Silica Nanoparticles as Superb Light Scattering Materials**

Jaehoon Ryu, Juyoung Yun, Jungsup Lee, Kisu Lee, and Jyongsik Jang\*

*School of Chemical and Biological Engineering, College of Engineering, Seoul National  
University (SNU), Seoul 151-742, Korea.*

[\*] E-mail: [jsjang@plaza.snu.ac.kr](mailto:jsjang@plaza.snu.ac.kr)

Tel.: +82-2-880-7069

Fax: +82-2-888-1604

## Experimental

**Materials :** Cetylpyridinium bromide (CPB) (98 %), tetraethyl orthosilicate (TEOS, 98%), cyclohexane, and *iso*-propanol were purchased from Aldrich Chemical Co. and used without further purification. Urea was purchased from Samchun Chemical. TiO<sub>2</sub> NPs (Ti-nanoxide T/SP), N-719, and an iodide-based redox electrolyte (AN50) were purchased from Solaronix (Aubonne, Switzerland) and used as received. FTO glass (15 Ω /cm<sup>2</sup>, thickness of 2.2 mm) was obtained from Pilkington (Toledo, USA)

**Fabrication of mesoporous silica nanoparticles with radial wrinkle structure :** 0.5 g (1.3 mmol) of cetylpyridinium bromide and 0.3 g (5.0 mmol) of urea were dissolved in 15 mL of water. And then, 7.5 mL of cyclohexane and 0.46 mL (6 mmol) of *iso*-propanol were added to the solution. With vigorous stirring, 1.25 g (6 mmol) of TEOS was dropwised to the mixed solution. After vigorous stirring for 30 min at room temperature, the reaction mixture was heated up to 70 °C, and this state was maintained for 8 h. The reaction mixture washed with acetone and water 3 times through centrifugation. The isolated WSNs by centrifugation were dried in the 70 °C. Finally, the dried WSNs were calcined at 550 °C for six hours in air.

**Assembly of dye-sensitized solar cells (DSSCs) :** A double-layered structure of the TiO<sub>2</sub> film was composed of the TiO<sub>2</sub>-NP (Solaronix, Ti-Nanoxide T/sp) underlayer and the WSNs with TiO<sub>2</sub> NPs overlayer as a scattering layer. To prepare a mixture of WSNs and paste, the WSNs were added to the paste which mixture of lauric acid, ethyl cellulose, and terpineol containing TiO<sub>2</sub> NPs (size = 15 - 20 nm). Fluorine-doped tin dioxide (FTO) glass substrates were cleaned by successive sonication in deionized water, acetone, and 2-propanol for 60 min

each, and then treated with oxygen plasma for 30 s. The FTO glass substrate was pretreated with an aqueous solution of  $\text{TiCl}_4$  (40 mm) and heated at 450 °C for 30 min. The double-layered structure of the  $\text{TiO}_2$  film which composed of  $\text{TiO}_2$ -NP under-layer and WSNs with  $\text{TiO}_2$  NPs over-layer was prepared by using a screen print onto the FTO substrate. The  $\text{TiO}_2$  films were sintered at 450 °C for 30 min, and then treated with  $\text{TiCl}_4$  and sintered again as above. The resulting  $\text{TiO}_2$  films were immersed in absolute ethanol containing N719 dye ( $5 \times 10^{-4}$  M) and kept at room temperature for 24 h. Pt counter electrodes were prepared on the FTO glasses using a 2-propanol solution of  $\text{H}_2\text{PtCl}_6$  (5 mM), followed by heating at 400 °C for 30 min in air. The electrolyte in the sealed cell was an  $\text{I}^- / \text{I}_3^-$  redox couple containing BMII (0.60 M), LiI (0.1 M), I<sub>2</sub> (0.05 M), and tert-butylpyridine (0.5 M) in acetonitrile.

**Characterization :** Images of transmission electron microscopy (TEM) were obtained from JEOL JEM-200CX, which are installed at the National Center for Inter-university Research Facilities (NCIRF) at Seoul National University. FE-SEM images were obtained from 6700; JEOL (Tokyo, Japan). Brunauer–Emmett–Teller (BET) surface areas of HNPs were determined using a Micromeritics analyzer (ASAP 2000; Micromeritics Co., Norcross, GA). Diffuse reflectance spectroscopy (DRS) was investigated from a Lambda 35 spectrophotometer (PerkinElmer). The photocurrent–voltage (I–V) characteristics of the assembled DSSCs were evaluated using a 500 W xenon lamp (XIL model 05A50KS source units). The incident photon-to-current efficiency (IPCE; PV Measurements, Inc., Boulder, CO) was measured from 300 to 800 nm under the global AM 1.5 solar emission spectrum.

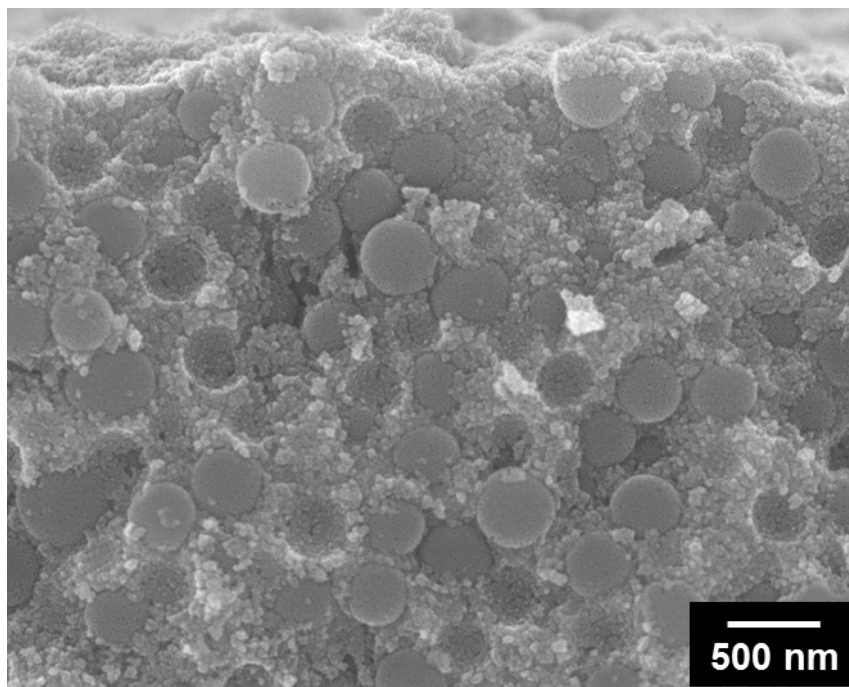

**Fig. S1.** SEM image of WSNs over-layer as a scattering layer of working electrode in the DSSCs device.

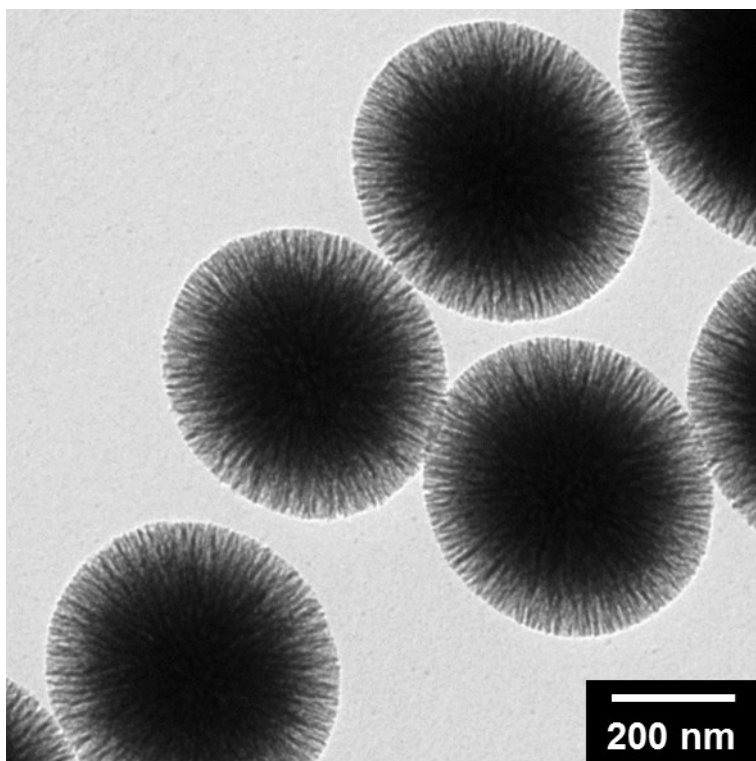

**Fig. S2** TEM image of fabricated WSNs after 20 h of heating time.

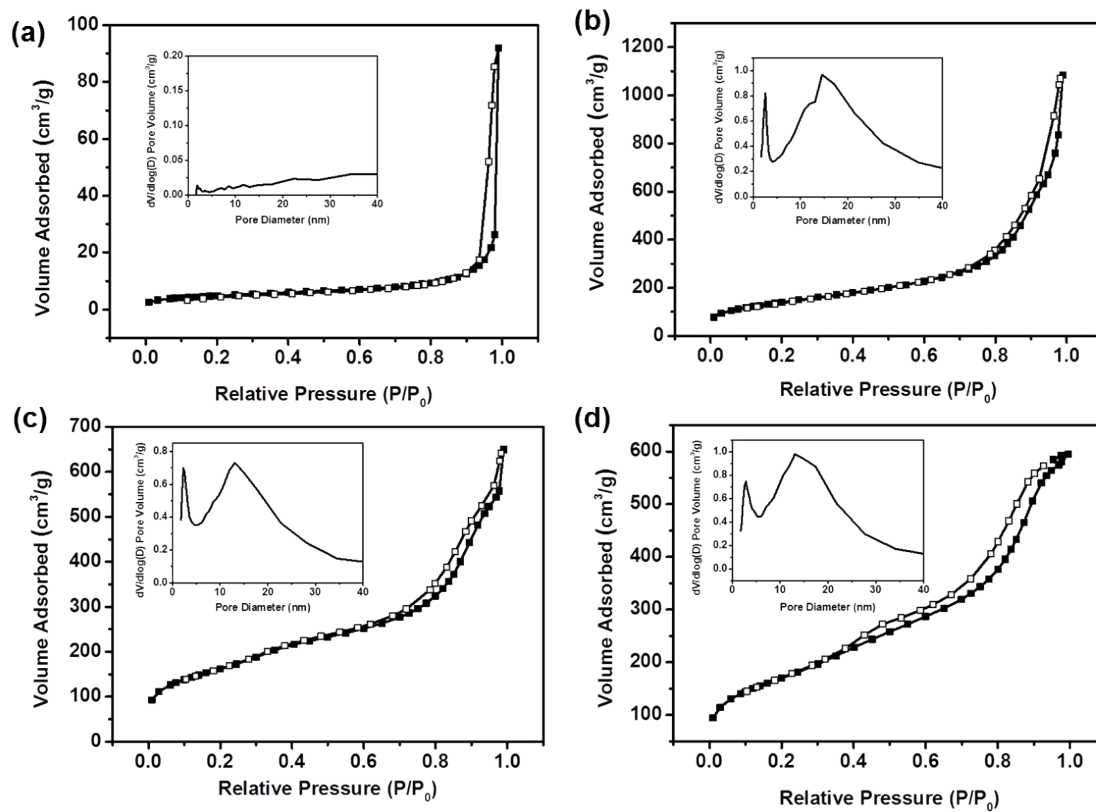

**Fig. S3**  $N_2$  adsorption-desorption isotherms and pore volume distribution plots (inset) of (a) 220 nm silica spheres and WSNs with (b) 220 nm, (c) 320 nm, (d) 430 nm diameters.

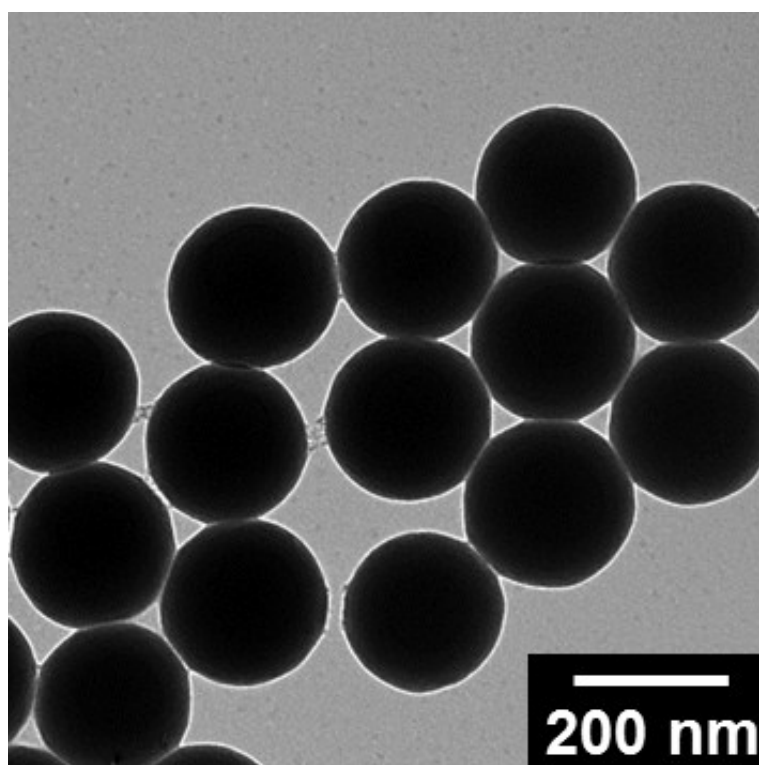

**Fig. S4** TEM image of 220 nm silica spheres.

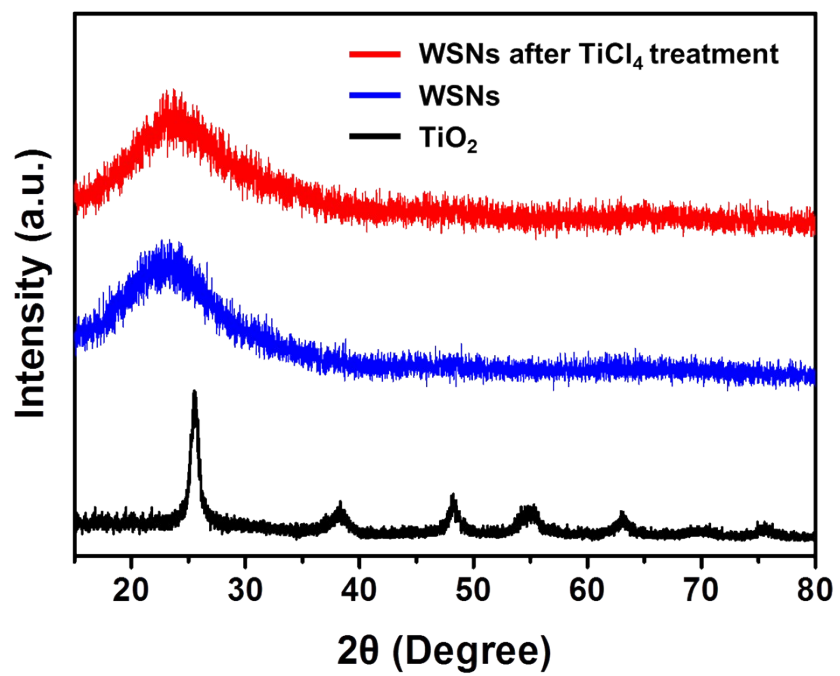

Fig. S5 XRD spectroscopy data of WSNs before and after TiCl<sub>4</sub> treatment, and TiO<sub>2</sub>.



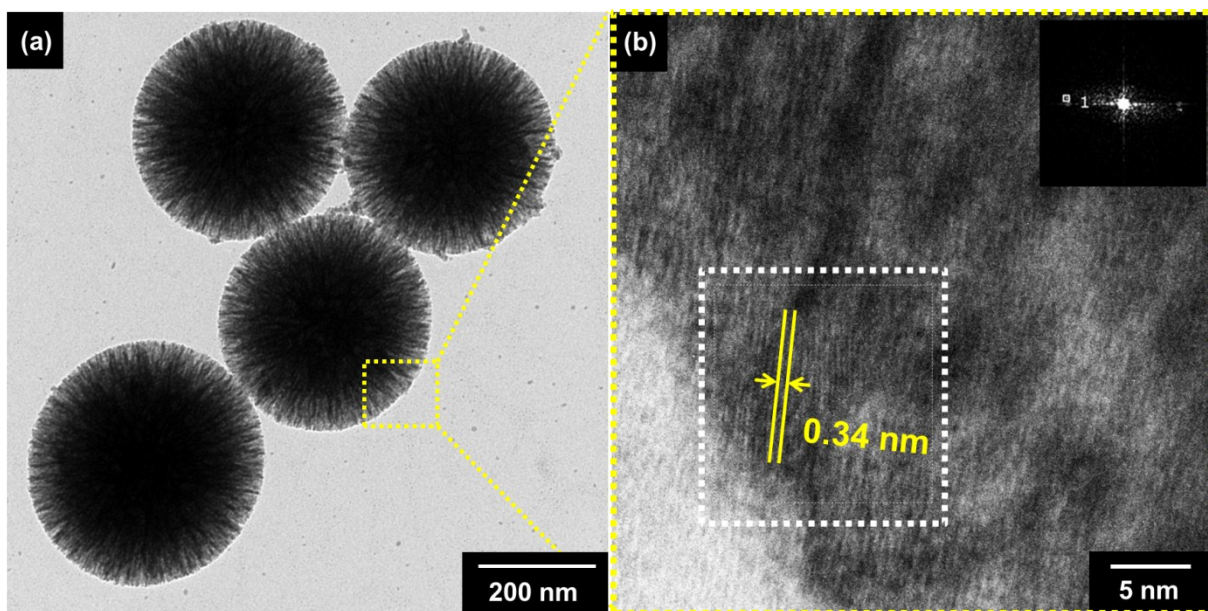

**Fig. S6** (a) TEM and (b) High resolution TEM (HR-TEM) images of the WSNs coated with thin  $\text{TiO}_2$  layer after  $\text{TiCl}_4$  post-treatment (inset : the corresponding fast Fourier transform (FFT) pattern).

**Table S1.** Summary of BET analysis of the TiCl<sub>4</sub> treated-silica spheres and TiCl<sub>4</sub> treated-WSNs with various sizes

| <b>Sample</b>                         | <b>BET area [m<sup>2</sup> g<sup>-1</sup>]</b> | <b>Inter-wrinkle distance [nm]<sup>a)</sup></b> |
|---------------------------------------|------------------------------------------------|-------------------------------------------------|
| TiCl <sub>4</sub> treated-220 spheres | 15.94                                          | –                                               |
| TiCl <sub>4</sub> treated-220 WSNs    | 546.45                                         | 10–20                                           |
| TiCl <sub>4</sub> treated-320 WSNs    | 557.83                                         | 10–20                                           |
| TiCl <sub>4</sub> treated-430 WSNs    | 579.82                                         | 10–20                                           |

<sup>a)</sup> Corresponding to wide peak in BJH pore distribution plots; There are two peaks in BJH plot, consisting sharp peak (2 nm) and wide band (ca. 15 nm)

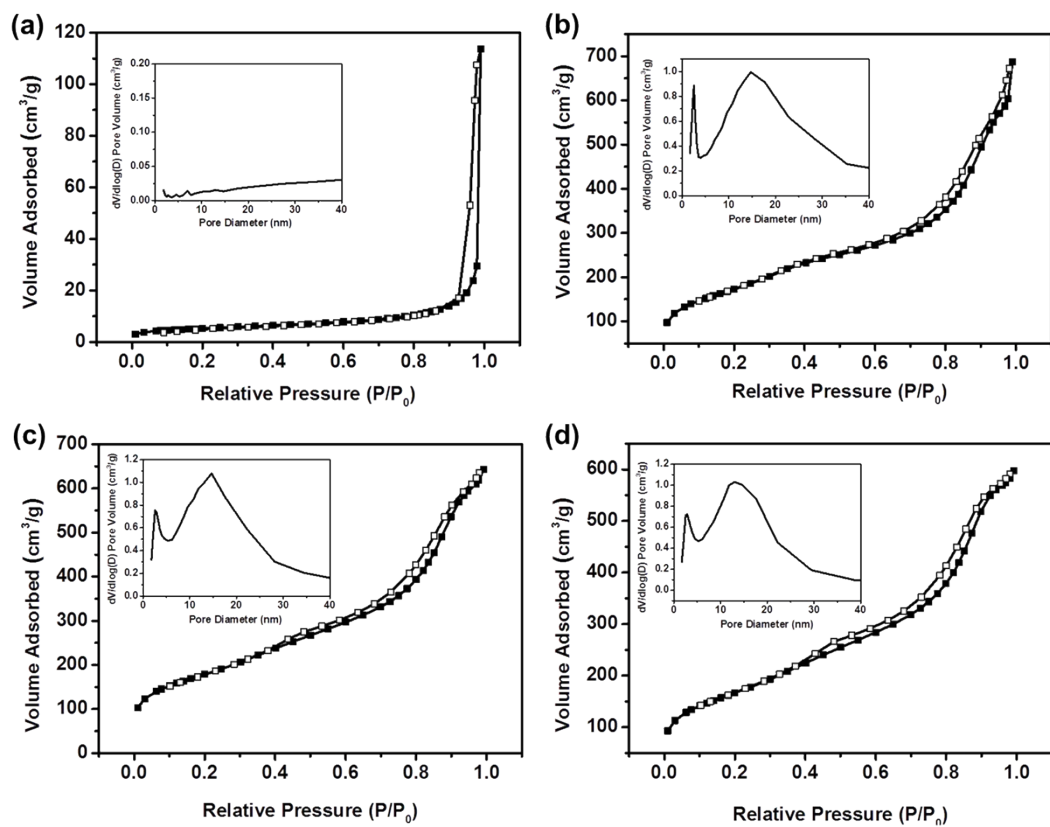

**Fig. S7**  $N_2$  adsorption-desorption isotherms and pore volume distribution plots (inset) of (a)  $TiCl_4$  treated-220 nm silica spheres and  $TiCl_4$  treated-WSNs with (b) 220 nm, (c) 320 nm, (d) 430 nm diameters.

**Table S2.** Summary of the dye adsorption amount on scattering layer of WSNs and silica spheres-based DSSCs

| <b>Sample</b>     | <b>Dye adsorption amount</b><br><b>[ <math>\times 10^{-7}</math> mol·cm<sup>-2</sup> ]</b> |
|-------------------|--------------------------------------------------------------------------------------------|
| Ref <sup>b)</sup> | 1.000                                                                                      |
| 220 spheres       | 0.891                                                                                      |
| 220 WSNs          | 0.966                                                                                      |
| 320 WSNs          | 0.972                                                                                      |
| 430 WSNs          | 0.988                                                                                      |

<sup>a)</sup>Active area of the assembled DSSC samples is 0.16 cm<sup>2</sup>

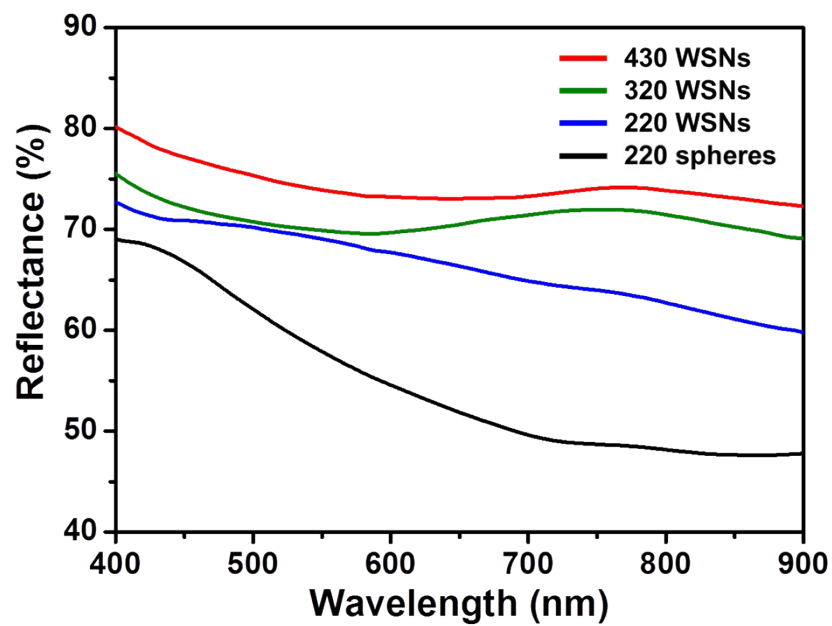

**Fig. S8** Diffused reflectance spectra for  $\text{TiCl}_4$  treated-200 nm silica spheres and  $\text{TiCl}_4$  treated-WSNs with various sizes (220, 320, 430 nm).

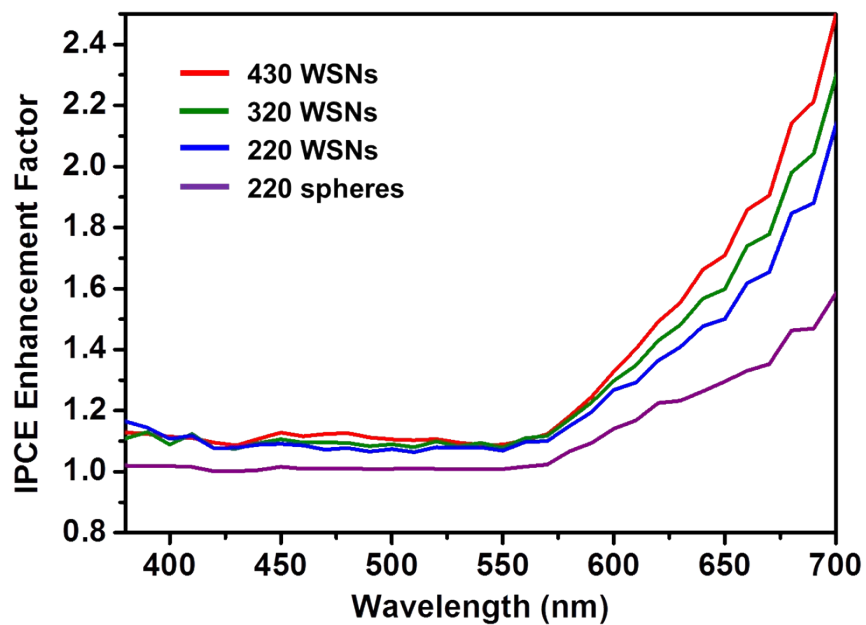

Fig. S9 IPCE enhancement factor based on reference cells ( $=\text{IPCE}_{\text{sample}}/\text{IPCE}_{\text{ref}}$ ).

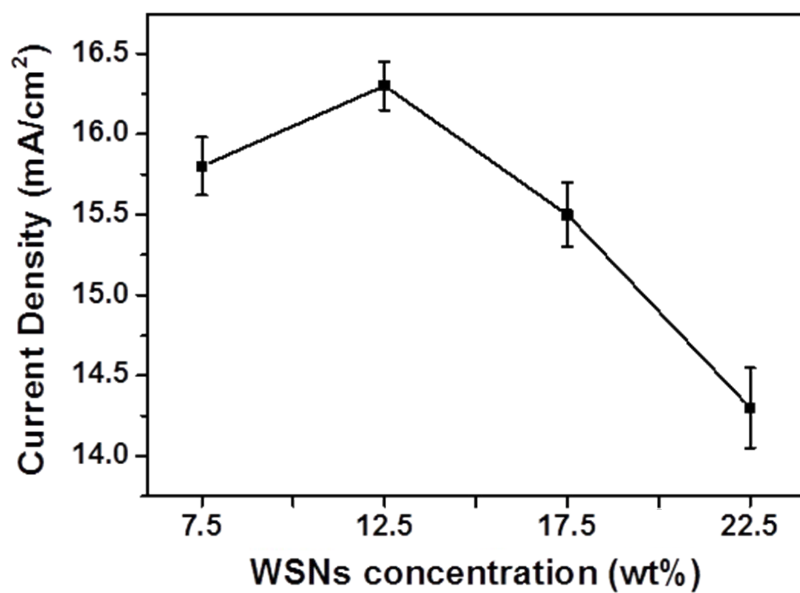

**Fig. S10** Current density ( $J_{sc}$ ) of the anode film as a function of WSNs concentration in the scattering layer.
